# Supplementary material for: Transcriptomics Analysis Reveals the Immune Response Mechanism of Rabbits with Diarrhea Fed an Antibiotic-Free Diet
Source: MDPI journal article supplement (doi:10.3390/ani11102994), 2021-10-19
Supplement: s1 [file s1]

Table S1. Clean reads quality metrics.

| sample | library          | raw_reads | clean_reads | clean_bases | error_rate | Q20   | Q30   | GC_pct |
|--------|------------------|-----------|-------------|-------------|------------|-------|-------|--------|
| H_B_1  | FRAS200021350-1r | 45531014  | 44147252    | 6.62G       | 0.03       | 97.54 | 93.46 | 50.41  |
| H_B_2  | FRAS200021351-1r | 44556194  | 43117928    | 6.47G       | 0.03       | 97.6  | 93.41 | 44.85  |
| H_B_3  | FRAS200021352-1r | 51102454  | 49354122    | 7.4G        | 0.03       | 97.4  | 93.2  | 47.45  |
| H_Z_1  | FRAS200021347-1r | 46218568  | 44740058    | 6.71G       | 0.03       | 97.21 | 92.85 | 44.73  |
| H_Z_2  | FRAS200021348-1r | 41977676  | 40444974    | 6.07G       | 0.03       | 97    | 92.71 | 49.8   |
| H_Z_3  | FRAS200021349-1r | 45774428  | 44408618    | 6.66G       | 0.03       | 97.3  | 93.14 | 50.86  |
| J_B_1  | FRAS200021307-1r | 43678660  | 42569122    | 6.39G       | 0.02       | 98.25 | 94.99 | 57.14  |
| J_B_2  | FRAS200021310-1r | 44315400  | 42773156    | 6.42G       | 0.03       | 96.78 | 92.32 | 48.36  |
| J_B_3  | FRAS200021309-1r | 45874976  | 44644908    | 6.7G        | 0.03       | 97.73 | 93.7  | 52.61  |
| J_Z_1  | FRAS200021304-1r | 45824314  | 44705384    | 6.71G       | 0.03       | 97.75 | 93.8  | 50.8   |
| J_Z_2  | FRAS200021305-1r | 46453394  | 45365010    | 6.8G        | 0.03       | 97.61 | 93.54 | 52.19  |
| J_Z_3  | FRAS200021306-1r | 43502138  | 42184332    | 6.33G       | 0.03       | 97.66 | 93.6  | 51.27  |
| K_B_1  | FRAS200021335-1r | 40777484  | 39636372    | 5.95G       | 0.03       | 96.97 | 92.56 | 48.07  |
| K_B_2  | FRAS200021336-1r | 47977282  | 46569360    | 6.99G       | 0.03       | 97.1  | 92.7  | 45.4   |
| K_B_3  | FRAS200021337-1r | 45572660  | 44163540    | 6.62G       | 0.03       | 97.65 | 93.76 | 54.08  |
| K_Z_1  | FRAS200021332-1r | 47465070  | 46235450    | 6.94G       | 0.03       | 97.63 | 93.76 | 54.07  |
| K_Z_2  | FRAS200021333-1r | 46351422  | 45191644    | 6.78G       | 0.03       | 97.43 | 93.31 | 53.01  |
| K_Z_3  | FRAS200021334-1r | 45838342  | 44459204    | 6.67G       | 0.03       | 96.96 | 92.62 | 49.73  |
| M_B_1  | FRAS200021316-1r | 48313798  | 47079708    | 7.06G       | 0.03       | 97.37 | 93.12 | 47.66  |
| M_B_2  | FRAS200021319-1r | 41740030  | 40705516    | 6.11G       | 0.03       | 97.93 | 94.17 | 52.72  |
| M_B_3  | FRAS200021318-1r | 45547076  | 44406510    | 6.66G       | 0.03       | 97.84 | 93.96 | 53.55  |
| M_Z_1  | FRAS200021313-1r | 44674116  | 43584230    | 6.54G       | 0.03       | 97.59 | 93.46 | 48.72  |
| M_Z_2  | FRAS200021314-1r | 41528492  | 40285156    | 6.04G       | 0.03       | 97.54 | 93.46 | 48.83  |
| M_Z_3  | FRAS200021315-1r | 47729188  | 46651768    | 7.0G        | 0.03       | 97.8  | 93.93 | 53.01  |
| S_B_1  | FRAS200021344-2r | 47663190  | 46724272    | 7.01G       | 0.03       | 95.35 | 88.67 | 49.37  |
| S_B_2  | FRAS200021342-1r | 47012554  | 45384808    | 6.81G       | 0.03       | 97.6  | 93.64 | 48.83  |
| S_B_3  | FRAS200021343-1r | 46525792  | 44895756    | 6.73G       | 0.03       | 97.8  | 94.05 | 53.69  |
| S_Z_1  | FRAS200021339-1r | 50940940  | 49399504    | 7.41G       | 0.03       | 97.54 | 93.65 | 52.52  |
| S_Z_2  | FRAS200021341-1r | 52301622  | 50286390    | 7.54G       | 0.03       | 97.62 | 93.45 | 46.46  |
| S_Z_3  | FRAS200021340-1r | 46605648  | 45513426    | 6.83G       | 0.03       | 97.81 | 94.03 | 54.12  |
| Z_B_1  | FRAS200021329-1r | 46152296  | 44490556    | 6.67G       | 0.03       | 97.56 | 93.6  | 53.39  |
| Z_B_2  | FRAS200021330-1r | 45717174  | 43829894    | 6.57G       | 0.03       | 97.58 | 93.71 | 54.06  |
| Z_B_3  | FRAS200021331-1r | 46345198  | 44945774    | 6.74G       | 0.03       | 97.23 | 92.95 | 50.86  |
| Z_Z_1  | FRAS200021323-1r | 43817080  | 42671884    | 6.4G        | 0.03       | 97.87 | 94    | 49.76  |
| Z_Z_2  | FRAS200021325-1r | 46088580  | 44917438    | 6.74G       | 0.03       | 97.56 | 93.49 | 50.73  |
| Z_Z_3  | FRAS200021324-1r | 48746950  | 47481918    | 7.12G       | 0.03       | 97.3  | 93.24 | 50.85  |

NOTE: S\_Z: The duodenum of healthy rabbits, S\_B: Diarrhea in duodenum of rabbits, H\_Z: Healthy rabbit ileum, H\_B: Diarrhea rabbit ileum, K\_Z: Healthy rabbit jejunum, K\_B: Diarrhea rabbit jejunum, M\_Z: Healthy cecum of rabbits, M\_B: Diarrhea rabbit cecum, J\_Z: Healthy rabbit colon, J\_B: Colon of diarrhea rabbit, Z\_Z: Healthy rabbit rectum, Z\_B: Rectum of diarrhea rabbit.

- 1.sample: sample name
- 2.library: library number
- 3.raw\_reads: the number of reads in the original data
- 4.clean\_reads: the number of reads after filtering the original data
- 5.clean\_bases: base number of filtered original data (clean base = clean reads \* 150bp)
- 6.error\_rate: overall data sequencing error rate
- 7.Q20: percentage of bases with phred value greater than 20 in total bases
- 8.Q30: percentage of bases with phred value greater than 30 in total bases
- 9.GC\_pct: Percentage of G and C in four bases of clean reads

Table S2. Summary statistics for mapped data of samples.

| sample | total_reads | total_map        | read1_map        | read2_map        |
|--------|-------------|------------------|------------------|------------------|
| H_B_1  | 44147252    | 38371411(86.92%) | 17496177(39.63%) | 17433187(39.49%) |
| H_B_2  | 43117928    | 40029230(92.84%) | 17255892(40.02%) | 17213594(39.92%) |
| H_B_3  | 49354122    | 40342646(81.74%) | 17464157(35.39%) | 17420414(35.3%)  |
| H_Z_1  | 44740058    | 40682538(90.93%) | 17593789(39.32%) | 17551122(39.23%) |
| H_Z_2  | 40444974    | 34331241(84.88%) | 15356824(37.97%) | 15311976(37.86%) |
| H_Z_3  | 44408618    | 37994723(85.56%) | 17303869(38.97%) | 17232566(38.8%)  |
| J_B_1  | 42569122    | 36204120(85.05%) | 14951300(35.12%) | 14905066(35.01%) |
| J_B_2  | 42773156    | 36350059(84.98%) | 16304042(38.12%) | 16191991(37.86%) |
| J_B_3  | 44644908    | 39181226(87.76%) | 18478979(41.39%) | 18389189(41.19%) |
| J_Z_1  | 44705384    | 39309992(87.93%) | 17691412(39.57%) | 17628851(39.43%) |
| J_Z_2  | 45365010    | 37578849(82.84%) | 17315226(38.17%) | 17230099(37.98%) |
| J_Z_3  | 42184332    | 36648853(86.88%) | 16407177(38.89%) | 16343587(38.74%) |
| K_B_1  | 39636372    | 34218334(86.33%) | 15047723(37.96%) | 15025446(37.91%) |
| K_B_2  | 46569360    | 41712216(89.57%) | 17919103(38.48%) | 17860703(38.35%) |
| K_B_3  | 44163540    | 37611429(85.16%) | 17289645(39.15%) | 17227250(39.01%) |
| K_Z_1  | 46235450    | 39375485(85.16%) | 18562969(40.15%) | 18577691(40.18%) |
| K_Z_2  | 45191644    | 38493188(85.18%) | 18024555(39.88%) | 18004705(39.84%) |
| K_Z_3  | 44459204    | 37657826(84.7%)  | 17015854(38.27%) | 17001607(38.24%) |
| M_B_1  | 47079708    | 41829313(88.85%) | 18410479(39.1%)  | 18307040(38.89%) |
| M_B_2  | 40705516    | 36216676(88.97%) | 16866159(41.43%) | 16822154(41.33%) |
| M_B_3  | 44406510    | 38983466(87.79%) | 18355626(41.34%) | 18270903(41.14%) |
| M_Z_1  | 43584230    | 38754099(88.92%) | 17356320(39.82%) | 17293054(39.68%) |
| M_Z_2  | 40285156    | 34846494(86.5%)  | 15564883(38.64%) | 15501707(38.48%) |
| M_Z_3  | 46651768    | 39602947(84.89%) | 18602166(39.87%) | 18512214(39.68%) |
| S_B_1  | 46724272    | 40681519(87.07%) | 17974201(38.47%) | 17672922(37.82%) |
| S_B_2  | 45384808    | 39775771(87.64%) | 17480172(38.52%) | 17443460(38.43%) |
| S_B_3  | 44895756    | 37889057(84.39%) | 17707926(39.44%) | 17653472(39.32%) |
| S_Z_1  | 49399504    | 40971007(82.94%) | 18268898(36.98%) | 18198380(36.84%) |
| S_Z_2  | 50286390    | 46205938(91.89%) | 19058519(37.9%)  | 19013192(37.81%) |
| S_Z_3  | 45513426    | 37291551(81.94%) | 16803404(36.92%) | 16732404(36.76%) |
| Z_B_1  | 44490556    | 38384931(86.28%) | 17243448(38.76%) | 17269776(38.82%) |
| Z_B_2  | 43829894    | 38083852(86.89%) | 18085194(41.26%) | 18129669(41.36%) |
| Z_B_3  | 44945774    | 39431910(87.73%) | 17948168(39.93%) | 17952491(39.94%) |
| Z_Z_1  | 42671884    | 38521594(90.27%) | 16460351(38.57%) | 16404041(38.44%) |
| Z_Z_2  | 44917438    | 39743164(88.48%) | 18262932(40.66%) | 18212610(40.55%) |
| Z_Z_3  | 47481918    | 40306833(84.89%) | 18328541(38.6%)  | 18246784(38.43%) |

NOTE: S\_Z: The duodenum of healthy rabbits, S\_B: Diarrhea in duodenum of rabbits, H\_Z: Healthy rabbit ileum, H\_B: Diarrhea rabbit ileum, K\_Z: Healthy rabbit jejunum, K\_B: Diarrhea rabbit jejunum, M\_Z: Healthy cecum of rabbits, M\_B: Diarrhea rabbit cecum, J\_Z: Healthy rabbit colon, J\_B: Colon of diarrhea rabbit, Z\_Z: Healthy rabbit rectum, Z\_B: Rectum of diarrhea rabbit.

1. sample: sample name
2. total\_reads: the number of clean reads of sequencing data after quality control
3. total\_map: the number and percentage of reads compared to the genome
4. read1\_map: the number and percentage of read1 compared to the reference genome
5. read2\_map: the number and percentage of read2 compared to the reference genome

Table S3. Screening of significantly different genes related to diarrhea in rabbits.

| Tissue   | gene_name | gene_id            | log2FoldChange | pvalue      | Trend |
|----------|-----------|--------------------|----------------|-------------|-------|
| Duodenum | DNASE1    | ENSOCUG00000011323 | -6.587316965   | 1.23E-19    | ↑     |
|          | S100A8    | ENSOCUG00000009566 | 7.534476842    | 3.37E-17    | ↑     |
|          | S100A9    | ENSOCUG00000008632 | 6.395497506    | 3.37E-12    | ↑     |
|          | KNG1      | ENSOCUG00000005003 | 6.462204636    | 7.80E-12    | ↑     |
|          | F10       | ENSOCUG00000022738 | 4.984424984    | 1.45149E-05 | ↑     |
|          | F5        | ENSOCUG00000026781 | 3.106416552    | 3.82617E-07 | ↑     |
|          | CPB1      | ENSOCUG00000003084 | -3.169964966   | 0.0000119   | ↓     |
|          | CPA2      | ENSOCUG00000006983 | -2.560302791   | 0.0000289   | ↓     |
|          | CELA2A    | ENSOCUG00000008305 | -5.661969332   | 1.74E-14    | ↓     |
|          | IL1RN     | ENSOCUG00000004161 | 3.090328443    | 0.0000216   | ↑     |
| Jejunum  | IL17B     | ENSOCUG00000016145 | 2.927709689    | 0.0000286   | ↑     |
|          | S100A8    | ENSOCUG00000009566 | 12.2154977     | 2.4264E-45  | ↑     |
|          | MMP3      | ENSOCUG00000029337 | 5.938777912    | 9.91291E-08 | ↑     |
|          | CXCL10    | ENSOCUG00000016280 | 2.338400839    | 0.000314743 | ↑     |
|          | MMP1      | ENSOCUG00000017958 | 4.534835359    | 1.84709E-10 | ↑     |
|          | MAPK13    | ENSOCUG00000014799 | 1.903269626    | 0.000212727 | ↑     |
|          | KNG1      | ENSOCUG00000005003 | 5.261470659    | 5.58199E-06 | ↑     |
|          | BDKRB1    | ENSOCUG00000026468 | 3.432807704    | 0.00171423  | ↑     |
|          | F10       | ENSOCUG00000022738 | 9.484662622    | 9.70959E-09 | ↑     |
|          | F5        | ENSOCUG00000026781 | 2.736123891    | 0.000417724 | ↑     |
|          | ITGB7     | ENSOCUG00000001426 | -3.042604213   | 0.000113156 | ↓     |
|          | ERBB2     | ENSOCUG00000010569 | -1.723074211   | 0.000925303 | ↓     |
|          | PHLPP1    | ENSOCUG00000015736 | -1.858535703   | 0.00106037  | ↓     |
|          | G6PC      | ENSOCUG00000016018 | -4.590067528   | 0.000128402 | ↓     |
|          | PDGFC     | ENSOCUG00000017242 | -3.101436119   | 7.89469E-05 | ↓     |
|          | ERBB3     | ENSOCUG00000017322 | -3.994323867   | 2.51665E-06 | ↓     |
|          | ITGA11    | ENSOCUG00000017726 | -2.053676755   | 0.001166592 | ↓     |
|          | PCK1      | ENSOCUG00000017905 | -3.904347638   | 6.48232E-05 | ↓     |
|          | PIK3CD    | ENSOCUG00000011054 | -3.300429086   | 0.000760914 | ↓     |
|          | IL15      | ENSOCUG00000008827 | -2.390981974   | 0.000348426 | ↓     |
| Ileum    | IL7       | ENSOCUG00000029611 | -2.40562413    | 0.001151835 | ↓     |
|          | FABP6     | ENSOCUG00000005435 | -12.72560189   | 9.85E-54    | ↓     |
|          | KRT15     | ENSOCUG00000013123 | 3.421254358    | 4.23E-13    | ↑     |
|          | IL1RN     | ENSOCUG00000004161 | 3.700152565    | 5.14E-11    | ↑     |
|          | IL1A      | ENSOCUG00000008771 | 4.409391752    | 2.86E-10    | ↑     |
|          | IL17RC    | ENSOCUG00000028217 | 2.469090726    | 0.0000075   | ↑     |
|          | IL22RA1   | ENSOCUG00000006743 | 2.496431395    | 0.004512408 | ↑     |
|          | IL17RD    | ENSOCUG00000014051 | 5.192101269    | 0.005304381 | ↑     |
|          | CXCL8     | ENSOCUG00000011835 | 4.833400871    | 9.97E-08    | ↑     |
|          | S100A12   | ENSOCUG00000022646 | 7.57579071     | 1.5E-44     | ↑     |
|          | S100A8    | ENSOCUG00000009566 | 9.54494115     | 3.23E-44    | ↑     |
|          | S100A9    | ENSOCUG00000008632 | 9.117676467    | 3.39E-36    | ↑     |
|          | HGF       | ENSOCUG00000001618 | 4.122210442    | 0.001390457 | ↑     |
|          | ITGB5     | ENSOCUG00000014602 | 2.735684296    | 0.0000319   | ↑     |
|          | ITGB4     | ENSOCUG00000014951 | 1.880551732    | 0.000612556 | ↑     |
|          | ITGB6     | ENSOCUG00000014850 | 2.991003611    | 0.000665178 | ↑     |
|          | ITGB1     | ENSOCUG00000003623 | 1.885391983    | 0.001507658 | ↑     |
|          | EFNA1     | ENSOCUG00000004307 | 2.3830876      | 0.00000753  | ↑     |

|         |                    |              |             |   |
|---------|--------------------|--------------|-------------|---|
| PDGFA   | ENSOCUG00000005660 | 3.130378862  | 0.002567281 | ↑ |
| LAMA2   | ENSOCUG00000009427 | 4.014734373  | 3.11E-09    | ↑ |
| LAMA4   | ENSOCUG00000009655 | 1.618041159  | 0.005787269 | ↑ |
| PHLPP2  | ENSOCUG00000009972 | 2.933784623  | 0.001803729 | ↑ |
| ERBB2   | ENSOCUG00000010569 | 1.876298888  | 0.002625116 | ↑ |
| COL4A6  | ENSOCUG00000010845 | 4.530162195  | 0.000130921 | ↑ |
| CSF3R   | ENSOCUG00000011231 | 4.645486343  | 0.005162671 | ↑ |
| CREB3L4 | ENSOCUG00000011784 | 3.542619894  | 0.0000023   | ↑ |
| COL1A1  | ENSOCUG00000012881 | 2.195018335  | 0.003328664 | ↑ |
| COL4A1  | ENSOCUG00000013232 | 2.89023724   | 0.0000443   | ↑ |
| ITGA5   | ENSOCUG00000013369 | 2.481623679  | 0.002815669 | ↑ |
| MAPK3   | ENSOCUG00000013716 | 1.675277073  | 0.001117228 | ↑ |
| LAMB1   | ENSOCUG00000014676 | 2.329063172  | 0.000000352 | ↑ |
| AREG    | ENSOCUG00000016286 | 7.223454134  | 0.00000053  | ↑ |
| HSP90B1 | ENSOCUG00000016288 | 1.894066177  | 0.000123788 | ↑ |
| PCK1    | ENSOCUG00000017905 | 2.473914374  | 0.001042548 | ↑ |
| EPHA2   | ENSOCUG00000000786 | 2.148686481  | 0.001806855 | ↑ |
| FGFR4   | ENSOCUG00000003380 | 2.593117156  | 0.00000293  | ↑ |
| PPP2R2B | ENSOCUG00000006861 | 3.069213977  | 0.005344859 | ↑ |
| ITGA7   | ENSOCUG00000021735 | 3.167028823  | 7.41E-08    | ↑ |
| VSIG4   | ENSOCUG00000004172 | 3.674652977  | 0.0000921   | ↑ |
| C5      | ENSOCUG00000005673 | 6.213569255  | 0.001313146 | ↑ |
| C2      | ENSOCUG00000006999 | 3.30612759   | 1.47E-09    | ↑ |
| PROS1   | ENSOCUG00000025358 | 2.731983714  | 0.000802062 | ↑ |
| PLAU    | ENSOCUG00000003155 | 2.02180218   | 0.001876809 | ↑ |
| F5      | ENSOCUG00000026781 | 3.301803353  | 0.003065155 | ↑ |
| PLAT    | ENSOCUG00000009967 | 2.800201568  | 0.00000239  | ↑ |
| CPB1    | ENSOCUG00000003084 | 6.18811557   | 0.001405053 | ↑ |
| SLC15A1 | ENSOCUG00000012014 | 3.940888603  | 4.22E-09    | ↑ |
| COL14A1 | ENSOCUG00000015234 | 2.530712514  | 0.000186874 | ↑ |
| COL15A1 | ENSOCUG00000016236 | 3.910947665  | 0.000028    | ↑ |
| ATP1B1  | ENSOCUG00000006867 | 2.300976561  | 0.000253737 | ↑ |
| ATP1A1  | ENSOCUG00000001324 | 2.834557148  | 0.000000199 | ↑ |
| FLNB    | ENSOCUG00000000828 | 0.000506469  | 0.007714336 | ↑ |
| MECOM   | ENSOCUG00000010171 | 2.721265757  | 0.002058081 | ↑ |
| PLA2G4F | ENSOCUG00000011139 | 1.78861835   | 0.00127912  | ↑ |
| MAPT    | ENSOCUG00000011386 | 3.181727217  | 0.000000836 | ↑ |
| TGFB3   | ENSOCUG00000011415 | 2.274905311  | 0.002941936 | ↑ |
| HSPB1   | ENSOCUG00000012690 | 2.290493822  | 0.000049    | ↑ |
| PLA2G4D | ENSOCUG00000013994 | 6.27751001   | 0.001715242 | ↑ |
| MAP4K3  | ENSOCUG00000016679 | 2.081898645  | 0.003390982 | ↑ |
| ARRB1   | ENSOCUG00000026291 | 1.748110192  | 0.000288392 | ↑ |
| CACNB2  | ENSOCUG00000014849 | 3.044176658  | 0.0034483   | ↑ |
| MAPK13  | ENSOCUG00000014799 | 1.428441412  | 0.003319998 | ↑ |
| LTBR    | ENSOCUG00000001292 | 2.403394957  | 0.0000552   | ↑ |
| CARD10  | ENSOCUG00000003517 | 2.922220459  | 0.0000056   | ↑ |
| LTB     | ENSOCUG00000006703 | -3.447239069 | 0.000000372 | ↓ |
| TRAF5   | ENSOCUG00000009132 | -2.269344546 | 0.00000817  | ↓ |
| BTK     | ENSOCUG00000010621 | -2.979273477 | 0.00000998  | ↓ |
| CARD11  | ENSOCUG00000011191 | -1.82459165  | 0.001102406 | ↓ |
| PLCG2   | ENSOCUG00000013105 | -2.653830763 | 0.000349697 | ↓ |

|       |          |                     |              |             |   |
|-------|----------|---------------------|--------------|-------------|---|
| Cecum | SYK      | ENSOCUG00000017539  | -3.704248675 | 0.00000117  | ↓ |
|       | PRKCB    | ENSOCUG00000013916  | -2.698623662 | 0.0000018   | ↓ |
|       | CXCR5    | ENSOCUG00000025048  | -3.885431213 | 0.0000549   | ↓ |
|       | PRKCD    | ENSOCUG00000010843  | -2.349925607 | 0.0000403   | ↓ |
|       | EAF2     | ENSOCUG00000007081  | -5.93489998  | 9.23E-24    | ↓ |
|       | S100A9   | ENSOCUG00000008632  | 7.589069605  | 3.09E-13    | ↑ |
|       | TNFAIP3  | ENSOCUG00000002310  | 2.836096588  | 0.000230988 | ↑ |
|       | CASP3    | ENSOCUG00000006627  | 2.347740619  | 8.67585E-06 | ↑ |
|       | MMP1     | ENSOCUG00000017958  | 6.610834208  | 3.24364E-15 | ↑ |
|       | MMP3     | ENSOCUG00000029337  | 3.155375112  | 2.32455E-05 | ↑ |
|       | CXCL8    | ENSOCUG00000011835  | 6.106093401  | 0.00000193  | ↑ |
|       | CXCL5    | ENSOCUG00000011838  | 4.495557183  | 0.00000368  | ↑ |
|       | CXCL10   | ENSOCUG00000016280  | 3.451294214  | 0.000298915 | ↑ |
|       | CXCL9    | ENSOCUG00000029588  | 2.51559754   | 0.003354174 | ↑ |
|       | CXCL11   | ENSOCUG00000026515  | 3.563587747  | 0.026398696 | ↑ |
|       | IL1A     | ENSOCUG00000008771  | 6.854705898  | 9.63E-08    | ↑ |
|       | IL22     | ENSOCUG00000001663  | 4.44689955   | 0.000667969 | ↑ |
|       | IL15     | ENSOCUG00000008827  | -2.074801258 | 0.001936108 | ↑ |
|       | IL7R     | ENSOCUG00000011402  | 4.946240741  | 0.005248886 | ↑ |
|       | IL1RN    | ENSOCUG00000004161  | 2.446741682  | 0.006173611 | ↑ |
|       | IL36A    | ENSOCUG00000014998  | 4.019428763  | 0.006314592 | ↑ |
|       | IL13RA1  | ENSOCUG00000013687  | 2.158012914  | 0.012584525 | ↑ |
|       | IL1B     | ENSOCUG00000023958  | 2.483277924  | 0.018040664 | ↑ |
|       | IL34     | ENSOCUG00000022125  | 1.852105207  | 0.021888719 | ↑ |
|       | IL18R1   | ENSOCUG00000016476  | 3.003108488  | 0.029125813 | ↑ |
|       | TNFRSF1B | ENSOCUG00000014127  | 2.452962989  | 0.000995981 | ↑ |
|       | LYN      | ENSOCUG00000003056  | 3.84753878   | 5.37737E-08 | ↑ |
|       | PLAU     | ENSOCUG00000003155  | 2.251344961  | 0.000506834 | ↑ |
|       | HKDC1    | ENSOCUG00000004938  | 3.052879221  | 0.000374782 | ↑ |
|       | TFRC     | ENSOCUG00000017033  | 3.029216799  | 0.000110669 | ↑ |
|       | PFKFB3   | ENSOCUG00000007516  | 2.403909314  | 0.000926385 | ↑ |
|       | XPNPEP2  | ENSOCUG00000010636  | 4.884418433  | 4.92473E-06 | ↑ |
|       | SLC15A1  | ENSOCUG00000012014  | 4.820095128  | 0.000102679 | ↑ |
|       | MME      | ENSOCUG00000017924  | 4.877219856  | 3.51715E-05 | ↑ |
|       | DEPP1    | ENSOCUG00000006521  | -3.859976025 | 0.000000189 | ↓ |
| Colon | S100A9   | ENSOCUG00000008632  | 11.40350837  | 7.16044E-30 | ↑ |
|       | S100A8   | ENSOCUG00000009566  | 6.836516905  | 0.00051574  | ↑ |
|       | MMP1     | ENSOCUG00000017958  | 6.296652225  | 7.22121E-09 | ↑ |
|       | IL1A     | ENSOCUG00000008771  | 7.489522523  | 1.69708E-12 | ↑ |
|       | IL16     | ENSOCUG00000010384  | -2.46222459  | 0.000788438 | ↑ |
|       | IL36A    | ENSOCUG00000014998  | 5.593679532  | 0.000953124 | ↑ |
|       | CXCL8    | ENSOCUG00000011835  | 5.866924546  | 1.78242E-08 | ↑ |
|       | LCN2     | ENSOCUG000000021002 | 4.229882207  | 0.000971543 | ↑ |
|       | SLC3A1   | ENSOCUG00000005464  | -3.999945721 | 3.27527E-05 | ↓ |
|       | COL14A1  | ENSOCUG00000015234  | -3.170161016 | 2.35505E-07 | ↓ |
|       | COL8A1   | ENSOCUG00000024465  | -3.230690306 | 4.93783E-06 | ↓ |
|       | COL6A5   | ENSOCUG00000024036  | -3.767495067 | 1.40268E-05 | ↓ |
|       | COL6A6   | ENSOCUG00000002486  | -4.449390866 | 2.71992E-05 | ↓ |
|       | COL1A1   | ENSOCUG00000012881  | -2.740241829 | 8.21544E-05 | ↓ |
|       | COL5A2   | ENSOCUG00000015020  | -2.403906309 | 9.26427E-05 | ↓ |
|       | COL5A3   | ENSOCUG00000014857  | -3.565878254 | 0.000169806 | ↓ |

|        |         |                    |              |             |   |
|--------|---------|--------------------|--------------|-------------|---|
| Rectum | CYP4B1  | ENSOCUG00000011201 | -5.127681597 | 2.34E-16    | ↓ |
|        | SHH     | ENSOCUG00000016862 | 8.566049596  | 1.24E-21    | ↑ |
|        | CXCR2   | ENSOCUG00000025638 | 6.11162353   | 0.001694478 | ↑ |
|        | IL1A    | ENSOCUG00000008771 | 6.941447969  | 8.4599E-20  | ↑ |
|        | IL1RN   | ENSOCUG00000004161 | 5.371704372  | 3.63638E-19 | ↑ |
|        | IL20RA  | ENSOCUG00000015696 | 4.975517876  | 0.000502545 | ↑ |
|        | IL17RB  | ENSOCUG00000013508 | -4.316071829 | 9.07128E-06 | ↓ |
|        | IL7     | ENSOCUG00000029611 | -2.762003519 | 6.0368E-05  | ↓ |
|        | IL15    | ENSOCUG00000008827 | -2.691778359 | 0.000271998 | ↓ |
|        | SLC15A1 | ENSOCUG00000012014 | -3.920374009 | 0.00196346  | ↓ |
|        | SLC3A1  | ENSOCUG00000005464 | -2.870305682 | 0.003135879 | ↓ |
|        | COL6A5  | ENSOCUG00000024036 | -7.857085412 | 0.000000444 | ↓ |
|        | COL1A2  | ENSOCUG00000012264 | -3.875026161 | 0.0000441   | ↓ |
|        | COL3A1  | ENSOCUG00000014988 | -3.595434196 | 0.000476194 | ↓ |
|        | COL16A1 | ENSOCUG00000005747 | -2.721842395 | 0.001506103 | ↓ |
|        | COL14A1 | ENSOCUG00000015234 | -2.78679341  | 0.001766174 | ↓ |
|        | COL11A1 | ENSOCUG00000013367 | -3.445515279 | 0.002952154 | ↓ |
|        | CPB2    | ENSOCUG00000017940 | -4.658268945 | 0.002255454 | ↓ |
|        | JCHAIN  | ENSOCUG00000027219 | -6.87932971  | 2.07E-26    | ↓ |

NOTE:

1. Tissue: intestinal tissue
2. gene\_name: the name of the gene
3. gene\_id: gene number
4. log2FoldChange: The ratio of gene expression level between the treatment group and the control group was processed by the shrinkage model of difference analysis software, and finally the logarithm was taken as the bottom 2
5. pvalue: value of significance test
6. Trend: The gene was significantly up-regulated or down-regulated in the intestine
